# Supplementary material for: lncRNA NR_038323 Suppresses Renal Fibrosis in Diabetic Nephropathy by Targeting the miR-324-3p/DUSP1 Axis
Source: PubMed Central journal article supplement — Mol Ther Nucleic Acids. 2019 Jul 23;17:741–53. doi: 10.1016/j.omtn.2019.07.007 (PMC6709345; doi:10.1016/j.omtn.2019.07.007), 2019-07-23
Supplement: mmc1.pdf [file mmc1.pdf]

OMTN, Volume 17

## Supplemental Information

### **lncRNA NR\_038323 Suppresses Renal Fibrosis in Diabetic Nephropathy by Targeting the miR-324-3p/DUSP1 Axis**

**Yanni Ge, Juan Wang, Dengke Wu, Yu Zhou, Shuangfa Qiu, Junxiang Chen, Xuejin Zhu, Xudong Xiang, Huiling Li, and Dongshan Zhang**

**LncRNA NR\_038323 suppresses renal fibrosis in diabetic nephropathy by targeting  
miR-324-3p/DUSP1 axis**

Yanni Ge, Juan Wang, Dengke Wu, Yu Zhou, Shuangfa Qiu, Junxiang Chen, Xuejin Zhu, Xudong  
Xiang, Huiling Li, Dongshan Zhang

**Supplementary Table** Patient characteristics

| Variable              | <b>MCD<br/>(10)</b> | <b>DN<br/>(9)</b>       |
|-----------------------|---------------------|-------------------------|
| Age(years)            | 45.8±4.8            | 48.5±2.1                |
| Gender (Male: Female) | 5:5                 | 5:4                     |
| Serum Glucose(mmol/L) | 5.1±0.4             | 10.6±2.1 <sup>#</sup>   |
| eGFR                  | 118.6±1.0           | 70.4±15.1 <sup>#</sup>  |
| Urine Protein         | —                   | +: 3<br>++: 3<br>+++: 3 |

Note: — indicate the lack of proteinuria.

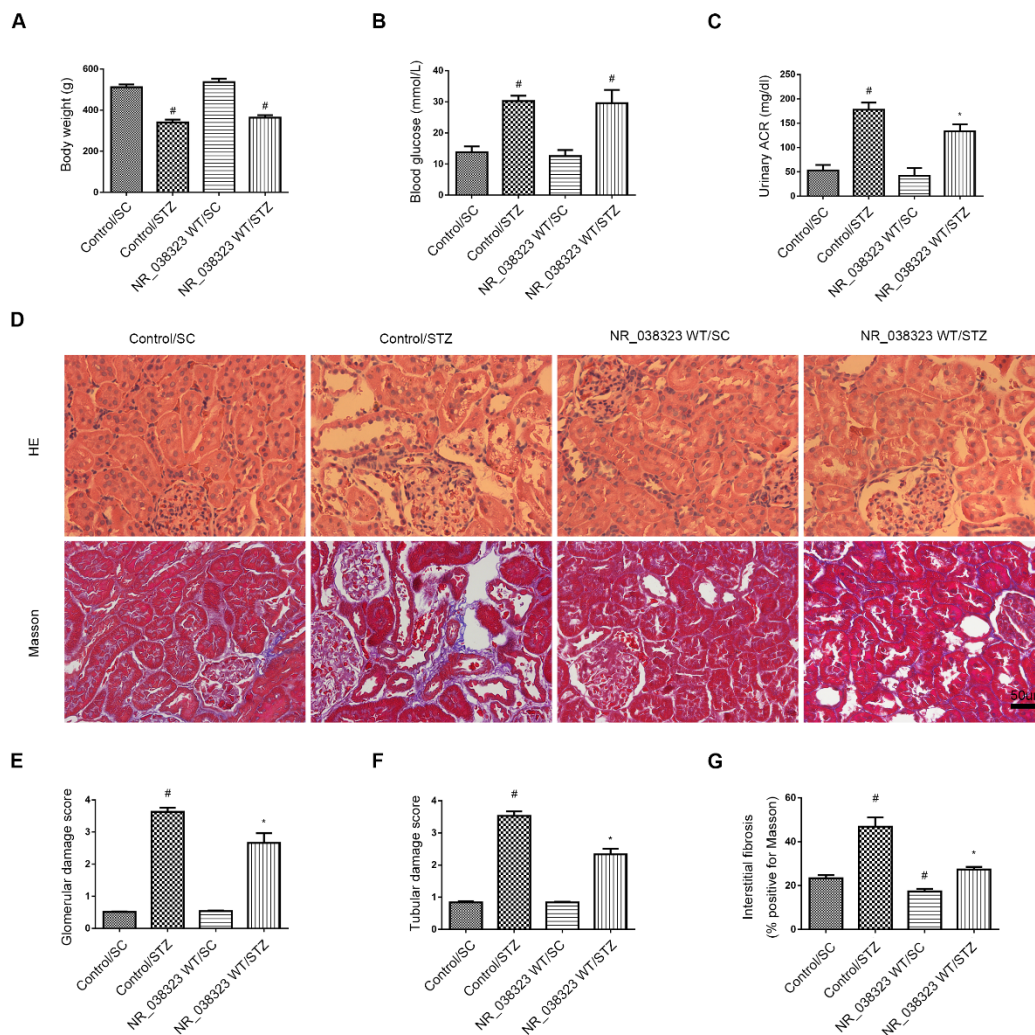

**Supplementary Figure1. Attenuation of renal Fibrosis in STZ-induced DN rats following overexpression of lncRNA NR 038323.** (A) The body weights of the rats. (B) Fasting glucose.(C) Urinary ACR measurements. (D) The staining of H&E and Masson. Quantification of glomerular damage score (E), tubular damage score (F), and tubulointerstitial fibrosis analysis (G) in the kidney cortex. Original magnification,  $\times 200$ . Bar, 50 $\mu$ m. Data are expressed as mean  $\pm$  SD (n=6). <sup>#</sup>p < 0.05, STZ or lncRNA NR\_038323 group vs. Control group; <sup>\*</sup>p < 0.05, STZ-treated with lncRNA NR\_038323 group vs. STZ group.

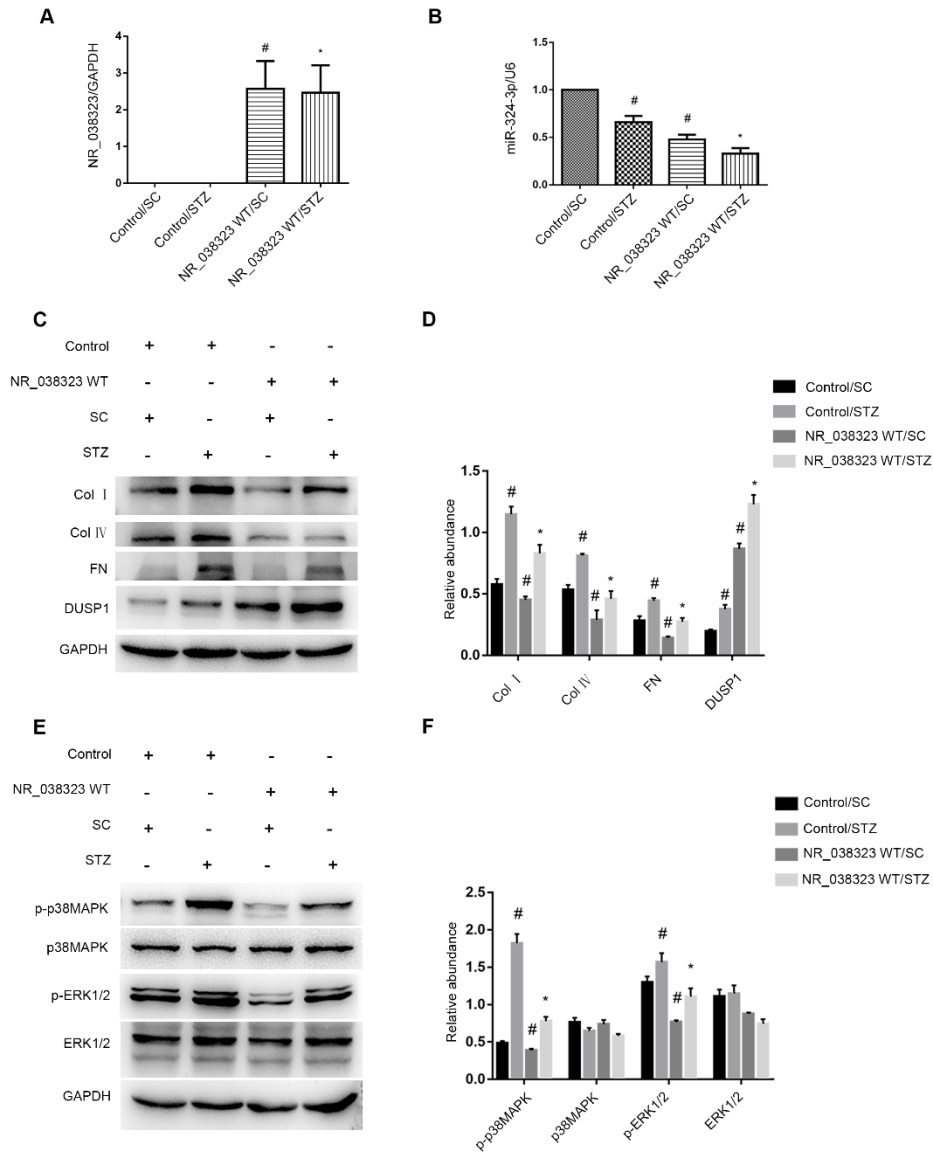

**Supplementary Figure2. Reduction of collagen I, collagen IV, fibronectin,  $\alpha$ -SMA via targeting miR-324-3p/DUSP1/p38MAPK and ERK1/2 axis in STZ-induced DN rats following overexpression of LncRNA NR 038323.** (A) RT-qPCR analysis of LncRNA NR 038323. (B) RT-qPCR analysis of miR-324-3p. (C) Western blot analysis of collagen I, collagen IV, fibronectin,  $\alpha$ -SMA, DUSP1, and GAPDH. (D) Densitometric quantification of western blot bands. (E) Western blot analysis of p-p38MAPK, p38MAPK, p-ERK1/2, ERK1/2, and GAPDH. (F) Densitometric quantification of western blot bands. Data are expressed as means  $\pm$  SD (n =6). Data are expressed as mean  $\pm$  SD (n=6). <sup>#</sup>*p* < 0.05, STZ or LncRNA NR 038323 group vs. Control group; <sup>\*</sup>*p* < 0.05, STZ-treated with LncRNA NR 038323 group vs. STZ group.

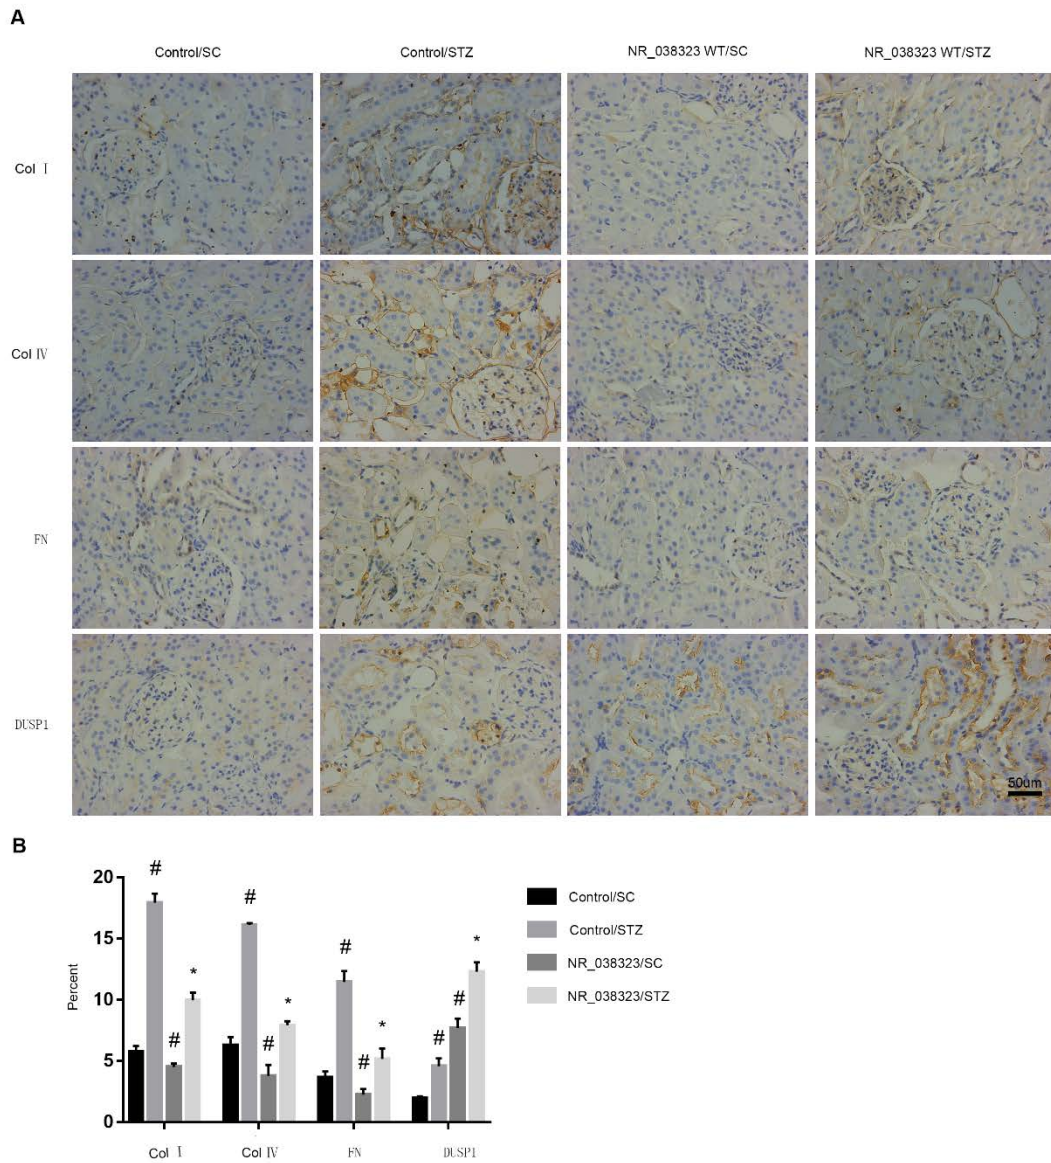

**Supplementary Figure3. Inhibition of collagen I, collagen IV, fibronectin, and  $\alpha$ -SMA expressions detected by immunochemistry in STZ-induced DN rats following overexpression of lncRNA NR\_038323** (A) Immunohistochemical staining of collagen I, collagen IV, fibronectin, and  $\alpha$ -SMA. (B) Quantification of immunohistochemical staining of collagen I, collagen IV, fibronectin, and  $\alpha$ -SMA. Original magnification,  $\times 200$ . Bar, 50  $\mu\text{m}$ . Data are expressed as mean  $\pm$  SD (n=6).  $\#p < 0.05$ , STZ or LncRNA NR\_038323 group vs. Control group;  $*p < 0.05$ , STZ-treated with lncRNA NR\_038323 group vs. STZ group.
